# Supplementary material for: [(Li0.8Fe0.2)OH]FeS and the ferromagnetic superconductors [(Li0.8Fe0.2)OH]Fe(S1−xSex) (0 < x ≤ 1)
Source: Royal Society of Chemistry journal article supplement (doi:10.1039/c5cc00038f), 2015-01-01

## Crystal Structure, magnetism and superconductivity of $[(\text{Li}_{0.8}\text{Fe}_{0.2})\text{OH}]\text{Fe}(\text{S}_{1-x}\text{Se}_x)$

### Supplementary

#### I. Crystallographic data of $[(\text{Li}_{0.8}\text{Fe}_{0.2})\text{OH}]\text{FeS}$

| $[(\text{Li}_{0.8}\text{Fe}_{0.2})\text{OH}]\text{FeS}$                      |                                                                   |           |                      |              |              |                 |
|------------------------------------------------------------------------------|-------------------------------------------------------------------|-----------|----------------------|--------------|--------------|-----------------|
| Formula                                                                      | $[(\text{Li}_{0.828(5)}\text{Fe}_{0.172(5)})\text{OH}]\text{FeS}$ |           |                      |              |              |                 |
| Formula weight /g mol <sup>-1</sup>                                          | 120.3                                                             |           |                      |              |              |                 |
| Crystal System                                                               | Tetragonal                                                        |           |                      |              |              |                 |
| Space group                                                                  | $P4/nmm$ O1 (No. 129)                                             |           |                      |              |              |                 |
| $a, c$ /pm                                                                   | 370.38(2), 888.5(1)                                               |           |                      |              |              |                 |
| $V$ /nm <sup>3</sup>                                                         | 0.12189(1)                                                        |           |                      |              |              |                 |
| $Z$                                                                          | 2                                                                 |           |                      |              |              |                 |
| $d_{\text{calc}}$ /gcm <sup>3</sup>                                          | 3.2758                                                            |           |                      |              |              |                 |
| $\mu$ (Mo- $K_{\alpha}$ ) /mm <sup>-1</sup>                                  | 7.642                                                             |           |                      |              |              |                 |
| Crystal Size / $\mu\text{m}^3$                                               | $30 \times 20 \times 5$                                           |           |                      |              |              |                 |
| Temperature /K                                                               | 293                                                               |           |                      |              |              |                 |
| Radiation /pm                                                                | Mo- $K_{\alpha}$ $\lambda = 71.073$                               |           |                      |              |              |                 |
| $\theta$ range /deg.                                                         | 4.6 – 30.4                                                        |           |                      |              |              |                 |
| $hkl$ range                                                                  | -4 → +5; -4 → +5; -11 → +12                                       |           |                      |              |              |                 |
| Tot., Uniq. Data, $R_{\text{int}}$                                           | 1694, 143, 0.0522                                                 |           |                      |              |              |                 |
| $N_{\text{Ref}}$ , $N_{\text{Par}}$                                          | 143, 15                                                           |           |                      |              |              |                 |
| $R1$ , $wR2$ , $S$                                                           | 0.0336, 0.0444, 1.21                                              |           |                      |              |              |                 |
| $\Delta\rho_{\text{min}}$ , $\Delta\rho_{\text{max}}$ , /e $\text{\AA}^{-3}$ | -0.50, 0.80                                                       |           |                      |              |              |                 |
| Atomic positions and equivalent displacement parameters                      |                                                                   |           |                      |              |              |                 |
| Atom                                                                         | Wyck.                                                             | $x$       | $y$                  | $z$          | occ.         | $U_{\text{eq}}$ |
| Li                                                                           | 4 <i>f</i>                                                        | 0         | 0                    | 0.061(6)     | 0.828(5)     | 0.035(5)        |
| Fe <sup>a</sup>                                                              | 2 <i>a</i>                                                        | 0         | 0                    | 0            | 0.172(5)     | 0.035(5)        |
| O                                                                            | 2 <i>c</i>                                                        | 0         | 1/2                  | 0.0798(6)    | 1.0          | 0.024(1)        |
| H                                                                            | 2 <i>c</i>                                                        | 0         | 1/2                  | 0.0160(9)    | 1.0          | 0.02            |
| Fe                                                                           | 2 <i>b</i>                                                        | 0         | 0                    | 1/2          | 1.0          | 0.0115(2)       |
| S                                                                            | 2 <i>c</i>                                                        | 1/2       | 0                    | 0.3546(1)    | 1.0          | 0.0120(3)       |
| Selected bond lengths (/pm) and angles (/deg)                                |                                                                   |           |                      |              |              |                 |
| Li-O                                                                         | 185.9(4) ×2                                                       | 223(3) ×2 | O-Li-O               | 170(1)       | 112(1)       | 92.8(1) ×4      |
| Fe <sup>a</sup> -O                                                           | 198.3(1) ×4                                                       |           | O-Fe <sup>a</sup> -O | 138.1(1) ×2  | 97.3(1) ×4   |                 |
| Fe-S                                                                         | 225.79(9) ×4                                                      |           | S-Fe-S               | 110.20(1) ×2 | 109.11(1) ×4 |                 |

II. X-ray powder patterns of  $[(\text{Li}_{0.8}\text{Fe}_{0.2})\text{OH}]\text{Fe}(\text{S}_{1-x}\text{Se}_x)$  ( $0 \leq x \leq 1$ )

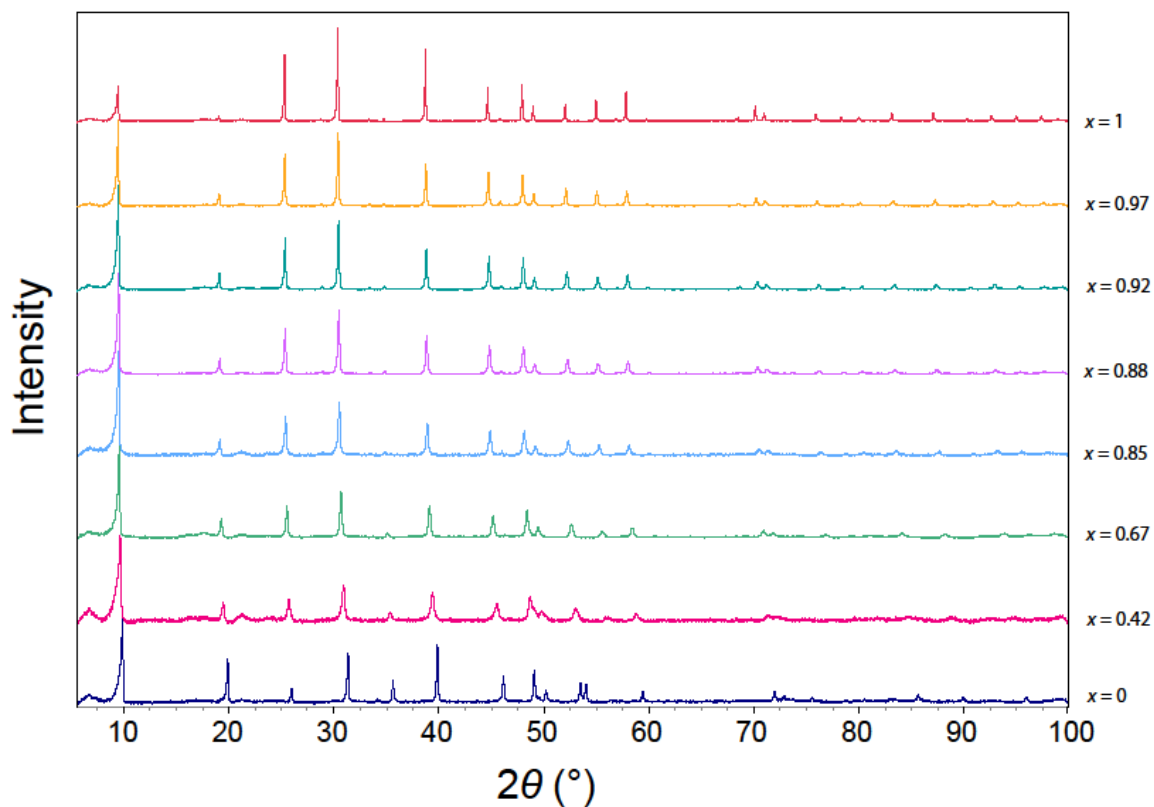

III. Curie-Weiss fit for  $[(\text{Li}_{0.8}\text{Fe}_{0.2})\text{OH}]\text{FeS}$

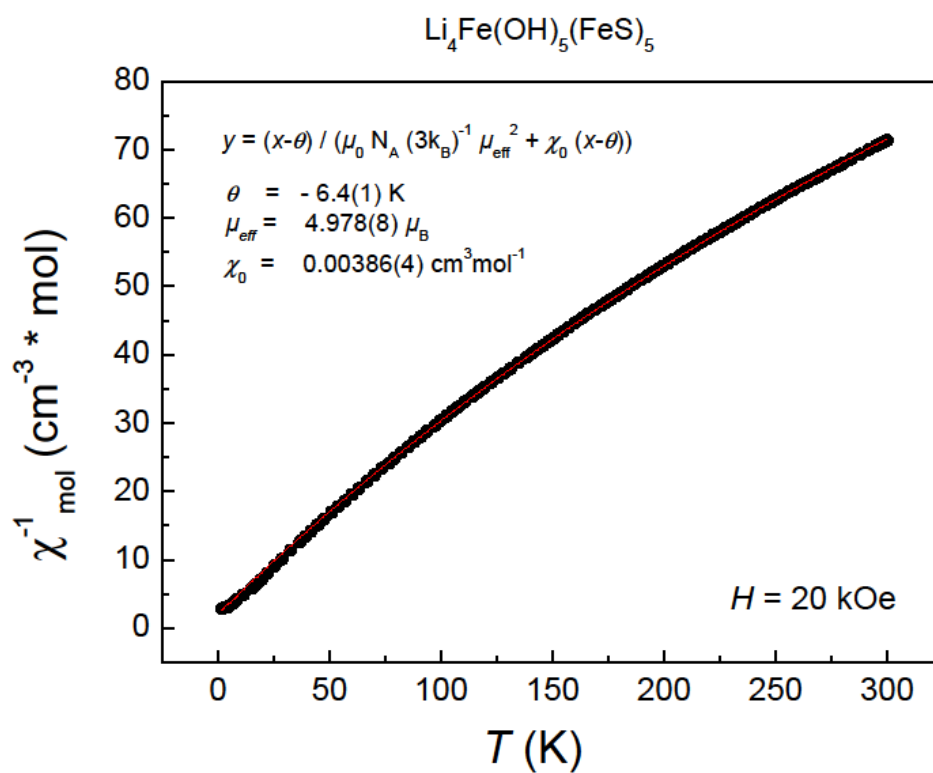

IV. Evolution of Fe-*Ch* distances (a) and *Ch*-Fe-*Ch* bond angles (b) in  $[(\text{Li}_{0.8}\text{Fe}_{0.2})\text{OH}]\text{Fe}(\text{S}_{1-x}\text{Se}_x)$  ( $0 \leq x \leq 1$ )

(a)

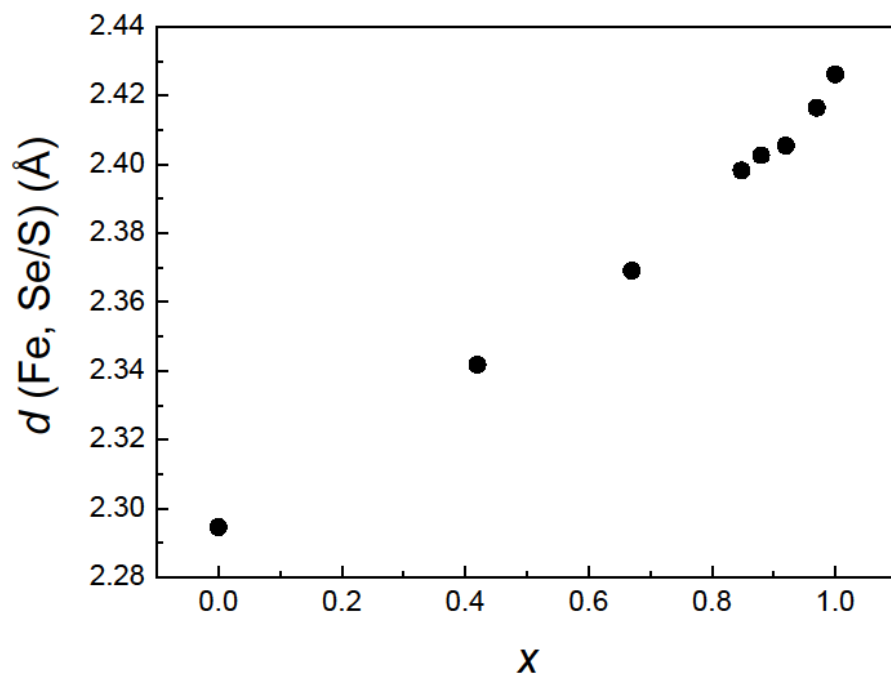

(b)

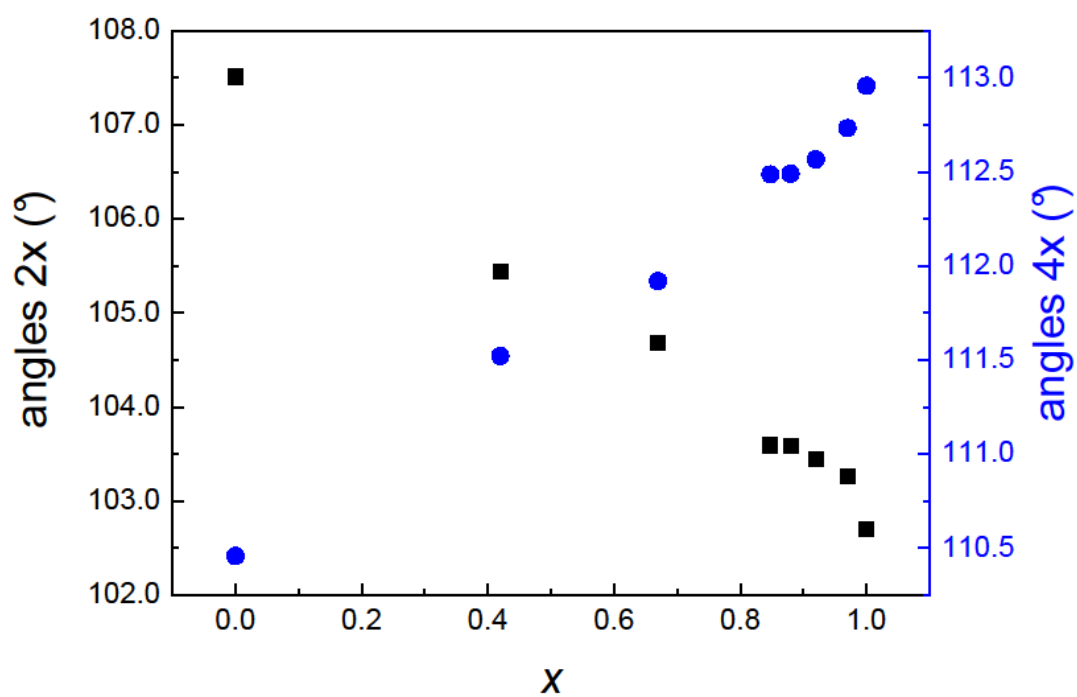

Supplement: c5cc00038f1.pdf [file c5cc00038f1.pdf]
